1 **Poor protection of amphibian evolutionary history**  
2 **reveals opportunities for global protected areas**

3

4 *Authors:* Jasmin Upton <sup>a,b,\*</sup>, Claudia L. Gray <sup>a</sup>, Benjamin Tapley <sup>c</sup>, Kris A. Murray <sup>d,e</sup>,  
5 Rikki Gumbs <sup>a,f</sup>

6 <sup>a</sup> EDGE of Existence Programme, Zoological Society of London, Regent's Park,  
7 London, United Kingdom

8 <sup>b</sup> University College London, Gower St, London WC1E 6BT, UK.

9 <sup>c</sup> Zoological Society of London, Regent's Park, London NW1 4RY, United Kingdom

10 <sup>d</sup> MRC Centre for Global Infectious Disease Analysis, Department of Infectious  
11 Disease Epidemiology, School of Public Health, Imperial College London, UK.

12 <sup>e</sup> MRC Unit, The Gambia at London School of Hygiene and Tropical Medicine,  
13 Atlantic Boulevard, Fajara, The Gambia

14 <sup>f</sup> Science and Solutions for a Changing Planet DTP, and the Department of Life  
15 Sciences, Imperial College London, Silwood Park Campus, Ascot, Berkshire, United  
16 Kingdom

17 \* *Corresponding author:* [jasminupton23@gmail.com](mailto:jasminupton23@gmail.com)

18 **Abstract**

19 As habitat loss is a major driver of amphibian population declines, protected areas  
20 (PAs) can play a crucial role in amphibian conservation. Documenting how well the  
21 global PA network captures the evolutionary history of amphibians can inform  
22 conservation prioritisation and action. We conducted a phylogenetic gap analysis to  
23 assess the extent to which amphibian phylogenetic diversity (PD) is unprotected by  
24 the PA network and compared this to other terrestrial vertebrate groups. 78% of  
25 amphibian species and 64% of global amphibian PD remains unprotected, which is  
26 higher than corresponding figures for squamates, mammals and birds. Amongst  
27 amphibians, salamanders were the least well protected, with 78% of PD unprotected,  
28 compared with 64% for caecilians and 63% for frogs. We identify areas that offer the  
29 greatest opportunity to capture unprotected amphibian evolutionary history. We  
30 could capture an additional 29.4% of amphibian PD, representing 40 billion years of  
31 evolutionary history, by protecting an additional 1.9% of global amphibian  
32 distributions (1.74% of global land area) and increasing the restrictions in 0.6% of  
33 amphibian distributions to match the management objectives of PAs in IUCN  
34 categories I or II. Importantly, we found that the spatial distribution of unprotected PD  
35 was correlated across all groups, indicating that expanding the PA network to  
36 conserve amphibian PD can secure imperilled vertebrate diversity more generally.

37 *Keywords:* vertebrate, amphibian, phylogenetic diversity, protected area, gap  
38 analysis, priority setting.

## 39 1. Introduction

40 Amphibian declines are a global conservation crisis. Approximately 41% of assessed  
41 amphibians are threatened (excluding Data Deficient assessments), compared with  
42 14% of birds, 19% of reptiles and 26% of mammals (Böhm et al. 2013, IUCN 2020).  
43 The Global Amphibian Assessment found 43% of amphibian species to be under  
44 rapid demographic decline, and 7.4% of species facing imminent extinction (Stuart et  
45 al. 2004). Global amphibian declines are driven by numerous, often synergistic,  
46 threats including habitat loss, infectious disease, invasive species and  
47 overexploitation (Stuart et al. 2004). The loss of amphibians can drastically affect  
48 food chains (Zipkin et al. 2020), alter nutrient exchange between aquatic and  
49 terrestrial systems and lower ecosystem biomass (Blaustein 1994; Colón-Gaud et al.  
50 2009). In addition, there are strong biases in protection across taxa, tending to  
51 favour birds and mammals, and large gaps exist in our knowledge of the extinction  
52 risk faced by amphibians (Böhm et al. 2013; Meiri & Chapple 2016; Tapley et al.  
53 2018).

54 Protected areas (PAs) can be an effective step in safeguarding biodiversity (Gray et  
55 al. 2016; Pacifici et al. 2020). Effective PAs could prove critical in amphibian  
56 conservation in the long term, as habitat loss poses the greatest threat to  
57 amphibians worldwide. Most amphibians are poor dispersers and range restricted  
58 and are therefore particularly sensitive to anthropogenic impacts on their habitats  
59 (Gardner et al. 2007; Chanson et al. 2008). However, the efficacy of PAs in  
60 protecting biodiversity is limited by their placement in areas that are not of high  
61 conservation value (Visconti et al. 2019). The successors to the Aichi targets, due to  
62 be agreed by the Convention on Biological Diversity in 2021, have the potential to  
63 motivate improvements in the distribution and extent of the PA network if based on  
64 scientific information.

65 The conservation of phylogenetic diversity (PD) is increasing in value within the  
66 global agenda. The Intergovernmental Science-Policy Platform on Biodiversity and  
67 Ecosystem Services (IPBES) recognises PD as a key indicator of nature's  
68 contributions to people (IPBES 2019). Research highlighting gaps and opportunities  
69 for conserving PD is therefore currently of great importance. Faith's (1992) metric of  
70 PD provides a measure to approximate feature diversity (Faith 1992; Forest et al.  
71 2007) by summing the phylogenetic branch lengths connecting all species in a clade  
72 or set of taxa across a phylogenetic tree. Using this information, we can identify  
73 clades which have a disproportionately large contribution to global evolutionary  
74 history (Faith 1992).

75 The combination of spatial patterns of PD with measures of extinction risk or  
76 protection can guide prioritisations for the conservation of global diversity (Rosauer  
77 et al. 2017; Pollock et al. 2017). Gap analyses can be used to identify areas that  
78 contain disproportionately high amounts of unprotected PD not captured by the PA  
79 network (Scott et al. 1994; Rodrigues et al. 2004a); these are obvious priorities if PA  
80 expansion is to safeguard unique evolutionary history.

81 Here, we use gap analysis methods to identify branches of the terrestrial vertebrate  
82 tree of life that are not captured by the current terrestrial PA network. We provide a  
83 global assessment of unprotected amphibian PD and explore the differences  
84 between the three amphibian orders. We contrast results for amphibians with those

85 for birds, mammals and squamates to determine whether amphibians are equitably  
86 protected by the current PA network. Finally, we identify grid cells where increased  
87 protection would provide the greatest potential gains for conserving global amphibian  
88 PD and demonstrate that large gains in safeguarding unique evolutionary history can  
89 be achieved with relatively small PA increases.

## 90 **2. Methods**

### 91 *2.1. Species data*

92 Spatial data were taken from IUCN (2017) for 6457 amphibian species (~80% of  
93 species, Frost 2020) and 5371 terrestrial mammal species (~83%, IUCN 2020), from  
94 BirdLife International (2017) for 9761 bird species (~88%, IUCN 2020) and from Roll  
95 et al. (2017) for 9557 squamates (~92%, Uetz & Hosek 2018). Amphibian orders  
96 were also assessed individually with spatial data downloaded from IUCN (2018).  
97 Distribution data were available for 5807 Anurans (frogs and toads; ~81%, Frost  
98 2020), 562 Caudata (salamanders and newts; ~76%, Frost 2020) and 161  
99 Gymnophiona (caecilians; 75%, Frost 2020). Only extant, resident ranges were used  
100 for amphibians, mammals and squamates and only extant, resident and breeding  
101 ranges were used for birds. Invasive ranges, where designated, were excluded and  
102 all distribution data were restricted to land.

103 We rasterized all distribution data at two spatial resolutions of ~1° (100 x 100 km)  
104 and ~2° (200 x 200 km) grid cells using a Mollweide equal area projection. Using too  
105 fine a spatial resolution can be misleading and increase the error in the correct  
106 placing of species ranges (Hurlbert & Jetz 2007); however, using too coarse a spatial  
107 resolution can misinterpret the distributions of very small ranging species and lead to  
108 spatial smoothing of the data and overestimated Extent Of Occurrence (EOO;  
109 Dormann et al. 2007). Differences in results under the two different spatial  
110 resolutions were negligible, so we present results at ~1° resolution in the main text  
111 and at ~2° resolution in the supporting information (**Figure A1 & A2**).

112 Phylogenetic data were taken from Jetz & Pyron (2018) for amphibians, Jetz et al.  
113 (2014) for birds, Kuhn et al. (2011) for mammals and Tonini et al. (2016) for  
114 squamates. Only taxa that were represented in the phylogeny and distribution data  
115 were included in the analyses, or 4374 mammals (67% of species), 7177 birds  
116 (64%), 9229 for squamates (89%), 5835 amphibians (72%). Within amphibians: 150  
117 Gymnophiona (70%), 525 Caudata (71%), 5188 Anura (72%). Phylogenetic  
118 uncertainty in the available data was accounted for by randomly sampling 25  
119 phylogenetic trees for each taxonomic group from the published 'pseudoposterior'  
120 distributions (Thomas et al. 2013), which are considered equally probable  
121 estimations of the phylogenetic relationships between species and clades. A sample  
122 of 25 trees was considered sufficient as there was little variation in the amount of PD  
123 unprotected on a global scale across all trees (**Figure A3**).

### 124 *2.2. Protected area data*

125 Spatial data for the global PA network were downloaded from the World Database  
126 on Protected Areas (IUCN & UNEP-WCMC 2019). Only PAs with polygon data that  
127 had a reported area larger than 0 km<sup>2</sup> and a recognised terrestrial status (including  
128 designated, established and inscribed) were used. PAs with point data only were

129 excluded from all analyses. Jones et al. (2018) found that more strictly managed PAs  
130 were subject to significantly lower levels of human pressure than the remaining  
131 categories, thus we first ran the analyses using only PAs in IUCN management  
132 category I and II, giving us a conservative estimate of the proportion of PD under  
133 protection. To evaluate the effect of our strict inclusion criteria for PAs, all analyses  
134 were repeated using all categories of IUCN PAs (Management categories I-VI) as  
135 well as all PAs labelled as 'Not Applicable', 'Not Assigned' and 'Not reported' to  
136 examine the increase in protected PD with less stringent protection criteria.

137 As 64.7% (12 714 of 19 637) of all PAs in IUCN management category I and II had a  
138 reported area less than or equal to 10 km<sup>2</sup>, a fine-scale resolution was essential for  
139 mapping the PA data, to reduce error in the detection of smaller PAs. All PAs were  
140 therefore rasterized at a resolution of 2.5 x 2.5 km and aggregated and reprojected  
141 with bilinear interpolation to match the resolution and extent of the amphibian range  
142 data. PAs outside the extent of amphibian distributions were excluded from the  
143 analyses.

144 We used a binary approach to determine whether a grid cell in the species range  
145 data was protected or unprotected (i.e. we did not consider any variation in the  
146 effectiveness of protection in each "protected" cell). We overlapped the fine-  
147 resolution PA raster with the lower resolution species raster and determined the  
148 proportion of each larger grid cell that was covered by PAs at the 2.5 x 2.5 km  
149 resolution (McGowan et al. 2020). We determined whether the grid cell was  
150 protected or not using eleven protection thresholds (PTs) ranging between 0 and  
151 100%, at 10% intervals. The percentage of overlap between a larger grid cell and the  
152 PA polygon must meet or exceed the given PT to be considered protected. The 20%  
153 threshold is met when at least 20% of the larger grid cell overlaps with 2.5 x 2.5km  
154 PA grid cells (hereafter >20%). A broad interval range was chosen to reflect all  
155 possible scenarios of protection, ranging from an optimistic scenario (>0% threshold)  
156 to a more conservative scenario (100% overlap threshold).

157 We considered a species present in a grid cell if any of its range overlapped with the  
158 grid cell (Safi et al. 2013; Roll et al. 2017) and we considered a species protected if  
159 its range was found to occur in at least one protected grid cell (Rodrigues et al.  
160 2004b). An alternative method would have been to scale protection based on the  
161 range size of the species, e.g. set a more demanding representation target (a larger  
162 percentage of the range) for species with more restricted ranges (Rodrigues et al.  
163 2004a; Thuiller et al. 2015; Rosauer et al. 2017). However, we considered one grid  
164 cell of a species range as protected to be sufficient for the protection of the species,  
165 given that amphibians typically occur in just 1-2 grid cells (González-del-Pliego et al.  
166 2019). The total number of protected and unprotected species for each taxonomic  
167 group was calculated. Results are based on the assumption that PAs are protecting  
168 species and, therefore, PD.

169 Two forms of error may occur from using a binary approach: 1) species considered  
170 absent from a PA are actually present within it (false absence), i.e. where the  
171 proportion of overlap of the PA with the grid cell does not meet the PT so the grid cell  
172 is considered unprotected; and 2) where species considered present within a PA are  
173 actually absent (false presence), i.e. the range of the species within a protected grid  
174 cell, does not actually overlap with the range of the PA (Rodrigues et al. 2004a).  
175 Selecting for larger PTs decreases the likelihood of both errors occurring; however,



176 higher PTs leave fewer grid cells protected and reduce our ability to observe the  
177 effects of PAs (**Figure A4**). To balance these sources of error, and as a somewhat  
178 arbitrary selection after observing the accumulation curves of PD protection for all  
179 taxa and the fact that there were few PAs greater than 20% of the species layer grid  
180 cell size (**Figure A5**), we present results/figures of the >20% PT; while sensitivity  
181 analyses relating to the choice of threshold are presented in the Supplementary  
182 Information (**Figure A4 & Table A1**). We also present the results of the >0% PT  
183 alongside to show a ‘best case’ scenario, which assumes any grid cell where PAs  
184 are present are effectively protecting evolutionary history, regardless of the  
185 percentage of the PA polygon that overlaps with the cell. In general, the locations of  
186 priority grid cells remained qualitatively similar when the analyses were run at each  
187 PT (**Figure A4**).

### 188 *2.3. Phylogenetic analysis*

189 The PD of each taxonomic group was calculated as the mean total length of all  
190 phylogenetic branches connecting all species present in the phylogeny, measured in  
191 billions of years (Gyr), across the sample of 25 phylogenetic trees. A phylogenetic  
192 branch was considered unprotected if no descendant species were deemed  
193 protected under our binary gap analysis. If at least one descendant species was  
194 considered protected, we considered all internal branches ancestral to that species  
195 to be protected. To determine the global distribution of unprotected PD, we summed  
196 the lengths of all branches in each unprotected grid cell that were unprotected  
197 globally (i.e. all grid cells in which all descendant species of the branch occur were  
198 unprotected).

199 To assess the similarity in the spatial distributions of PD between the different  
200 taxonomic groups we tested for correlations between the PD of each group across  
201 all grid cells when analyses were run under the >20% PT. The results for all other  
202 PT’s are provided in the supporting information (**Table A2**). We used a Moran’s I test  
203 (Gittleman & Kot 1990) to evaluate the data for spatial autocorrelation and ran  
204 pairwise correlations for all groups, corrected for spatial autocorrelation, using the R  
205 package ‘SpatialPack’ (Vallejos et al. 2018). A final pairwise correlation test was run  
206 between the spatial distributions of total amphibian PD and amphibian species  
207 richness. A Bonferroni correction for multiple testing was made to calculate the  
208 adjusted P-value at which to reject the null hypothesis.

209 To determine whether there was a significant difference in the proportion of  
210 unprotected PD within amphibian orders, we ran a one-way ANOVA. We then ran a  
211 Games-Howell post hoc analysis to identify pair-wise differences. All analyses were  
212 run in R version 3.5.3 (R Core Team 2019).

### 213 *2.4. Priority grid cells*

214 To investigate how increased coverage of the global PA network can capture  
215 unprotected PD, we identified the PD contribution of grid cells with the greatest  
216 unprotected amphibian PD. We identified the top 1% of grid cells with the highest  
217 levels of unprotected amphibian PD and designated them as ‘protected’. We then re-  
218 ran the gap analysis with the updated set of ‘protected’ grid cells and re-calculated  
219 the total amount of unprotected PD, identifying the gain in PD contribution of the  
220 newly protected percent of grid cells. We repeated this process until 50% of

221 unprotected grid cells had been captured. For comparison, we repeated this  
222 analysis, this time selecting 1% of unprotected grid cells at random to be 'protected'.  
223 As the complementary approach performed better than random for amphibians, we  
224 applied it to all taxonomic groups for comparison in the analyses.

225 Since the rate at which PD is captured declined markedly beyond 5% of grid cells  
226 (**Figure A6**), and in alignment with the methods of previous studies (Safi et al. 2013),  
227 we identified the top 5% of grid cells containing the largest amount of unprotected  
228 PD for each taxonomic group and highlighted them as 'priority areas'. Grid cells that  
229 contain a large amount of unprotected PD for all taxonomic groups represent a good  
230 opportunity for maximum protection of terrestrial vertebrate PD by declaration of new  
231 PAs. The overlap between priority areas for each taxonomic group was quantified as  
232 the percentage of priority grid cells shared across all groups. Finally, to address the  
233 problem of feasibility of establishing new PAs, we identified the number of amphibian  
234 priority grid cells that are protected by lower IUCN management categories (III-VI),  
235 and which would benefit conservation of amphibian PD if it were possible to upgrade  
236 these PAs to IUCN management categories I or II.

### 237 **3. Results**

#### 238 *3.1. Global protection of amphibian PD*

239 There were 212 379 PAs included in our analysis, including 19 637 (9.25%) PAs in  
240 IUCN management category I or II. Amphibians occurred in 11 482 grid cells  
241 (76.79% of global terrestrial land area). The percentage of grid cells meeting the PT  
242 declines rapidly as more stringent PTs are applied (**Table 1**), reflecting the fact that  
243 there are few PAs greater than 20% of the species layer grid cell size (100 x 100km;  
244 **Figure A7**). For all PT scenarios, more amphibian species were unprotected than  
245 either birds or mammals (**Figure 1A, Table A1**). Within amphibians, Caudata have  
246 the highest proportion of unprotected species (**Figure 1D**).

247 Amphibians, followed closely by squamates, have the greatest amount of  
248 unprotected PD (**Figure 1B & 1C, Table 1**). The greatest difference in protection  
249 across taxa occurs at the lower-intermediate protection thresholds (20-50%; **Figure**  
250 **1B & 1C**). The pattern was the same when all PA categories were used (Amount of  
251 unprotected PD in billions of years [as a percent of total PD]: Amphibian 41.33  
252 [34.94%], Squamate 38.61 [31.70%], Bird 7.09 [10.36%], Mammal 6.42 [14.76%])  
253 and areas identified as a priority remained largely the same (**Figure A8**).

254 Caudata has the greatest amount of unprotected PD of all amphibian orders (**Figure**  
255 **1E & 1F, Table 1**) and the proportion of unprotected PD in Caudata is significantly  
256 higher than the proportion of unprotected PD in Anura and Gymnophiona (One-way  
257 ANOVA;  $F = 2446.3$ ,  $p\text{-value} < 0.001$ , Games-Howell;  $p\text{-value} < 0.001$ ). The results  
258 for all PTs are provided in the supporting information (**Table A3**). When all PA  
259 categories were used, Gymnophiona had the greatest proportion of unprotected PD,  
260 followed by Caudata (Amount of unprotected PD in billions of years [as a percent of  
261 total PD]: Gymnophiona 2.89 [47%], Caudata 4.17 [42%], Anura 34.19 [33%]) and  
262 areas identified as a priority for unprotected PD for all amphibian orders remained  
263 largely the same (**Figure A9**).

### 264 3.2. PD Distribution and Priority Areas

265 Global amphibian PD reflects amphibian richness patterns (Pearson's correlation;  $r =$   
266  $0.97$ ,  $p$ -value  $< 0.001$ , **Figure A10**). Amphibian PD is poorly protected in the eastern  
267 United States, Central America, the Caribbean, the northern Andes and the Atlantic  
268 forests of Brazil (**Figure 2**). High levels of unprotected PD were also observed  
269 across Europe, Cameroon, Tanzania and South Africa, and Madagascar. In Asia,  
270 high levels of unprotected PD occur in the Western Ghats, southern China, Japan,  
271 Vietnam, Malaysian Borneo and the Philippines.

272 Many areas with high levels of unprotected amphibian PD harbour high levels of  
273 unprotected PD from all tetrapod groups, particularly across Central America, the  
274 Caribbean, the Atlantic forests of Brazil, Madagascar, the Western Ghats, and the  
275 Philippines. Overall, the spatial distribution of unprotected PD was strongly  
276 correlated across taxonomic groups (Pearson's correlation; amphibian and  
277 squamate:  $r = 0.45$ , amphibian and mammal:  $r = 0.56$ , amphibian and bird:  $r = 0.57$ ;  
278 all  $p$ -values  $< 0.001$ ). However, correlations between non-amphibian groups were  
279 higher (Pearson's correlation; birds and squamates:  $r = 0.63$ , birds and mammals:  $r =$   
280  $0.65$ , mammals and squamates:  $r = 0.68$ ; all  $p$ -value  $< 0.001$ ; correlations for all  
281 PTs: **Table A2**).

282 The top 5% of grid cells of unprotected PD for amphibians, identified in our  
283 complementarity analysis (**Figure 2**), cover 289 grid cells (approximately 2 890 000  
284 km<sup>2</sup>; 2.52% of all grid cells found to contain amphibians) and contained 52.73% of  
285 global unprotected amphibian PD (40.03 Gyr), and more than 29.43% of total  
286 amphibian PD (136 Gyr, Jetz & Pyron 2018). In addition, 67 (23% of 289) of these  
287 priority grid cells were found to be protected by lower category PAs (IUCN  
288 management categories III-VI), for which existing restrictions could potentially be  
289 increased. Therefore, establishing new PAs would be required in the remaining 222  
290 priority grid cells (1.93% of all grid cells found to contain amphibians and 1.48% of all  
291 terrestrial grid cells), equalling approximately 2 220 000 km<sup>2</sup> in area (1.74% of global  
292 land surface area).

293 Amphibian, bird, mammal and squamate priority grid cells were found to overlap by  
294 3.32% (**Figure 3A**), with overlapping grid cells located across Hispaniola, the Atlantic  
295 forests of Brazil, and Madagascar. 11.31% of all priority grid cells across all  
296 taxonomic groups were unique to amphibians only, located across the Americas,  
297 Cameroon, Tanzania, southern Europe, the Western Ghats of India, and Vietnam  
298 (**Figure 3A**).

299 There were spatial differences in the priority areas of unprotected PD for the different  
300 amphibian orders (**Figure 4**). For Caudata, priority areas occurred exclusively in the  
301 eastern United States. Priority areas of unprotected PD for Gymnophiona occurred in  
302 Colombia, Cameroon, Tanzania, the Seychelles and the Western Ghats of India.  
303 Priority areas for unprotected Anura PD were Central America, the northern Andes  
304 and the Atlantic forests of Brazil.

305 When the analyses were re-run using all PAs from all IUCN management categories  
306 (I-VI), 119 priority unprotected grid cells were identified for amphibians (**Figure A8**)  
307 and found to contain 17.66 Gyr of PD, the equivalent of 42.69% of unprotected PD  
308 (41.33 Gyr) and 12.99% of the PD of the entire clade. The spatial patterns of



309 unprotected PD and the location of priority areas when all PA categories were  
310 included were consistent with the results when only PA management categories I  
311 and II were included (**Figure A8 & A9**). Results of analyses with 200 x 200 km  
312 resolution are consistent with those above and shown in the supporting information  
313 (**Figure A1 & A2**).

#### 314 **4. Discussion**

315 Here we demonstrate that global amphibian PD is consistently under-protected  
316 relative to other terrestrial vertebrates. Despite being disproportionately threatened,  
317 conservation attention and action for amphibians and their associated habitat  
318 remains insufficient. Our gap analysis shows that, under our approach, 64% of all  
319 amphibian PD is not protected within the current terrestrial PA network. The lack of  
320 protection of the evolutionary history of Caudata and Gymnophiona is of particular  
321 conservation concern.

##### 322 *4.1. Global protection of amphibian PD*

323 To reduce the omission and commission errors that occur when employing a binary  
324 setting of species protection, a broad interval range of PTs were tested. Under all  
325 PTs, from the most optimistic to the most conservative scenario (and at different  
326 spatial resolutions), amphibian PD was consistently the least well protected of all  
327 vertebrate groups and the relative levels of protection between the taxa remained the  
328 same across all thresholds, indicating that our results appear robust.

329 These findings reflect the well-established taxonomic bias in vertebrate conservation  
330 (Leader-Williams & Dublin 2000; Clark & May 2002; Rodrigues et al. 2004a, 2004b),  
331 and emphasises the need to prioritize these clades in future. Indeed, our analyses  
332 reflect recent findings that amphibians and squamates comprise significantly more  
333 PD than either mammals or birds and we stand to lose significantly more  
334 evolutionary history if they remain unprotected (Gumbs et al. 2020).

335 Among amphibians, Caudata have the largest proportion of evolutionary history at  
336 risk (78%), and all orders have a significant proportion of unprotected evolutionary  
337 history (>63%). When we ran our analyses to include all PA categories,  
338 Gymnophiona had the greatest proportion of unprotected PD, suggesting that  
339 Caudata PD is being better captured by PAs of lower management categories than  
340 that of Gymnophiona. Worryingly, previous research on data deficient (DD)  
341 amphibians has shown that the majority of their ranges (81%) lie completely outside  
342 of PAs (Nori & Loyola 2015), and a large proportion of amphibians, particularly  
343 Gymnophiona, are currently recognised as DD (Gymnophiona species: 55.7%,  
344 Anura: 20.3%, Caudata: 8.6%; IUCN 2020) or lack assessments entirely; future  
345 estimates of unprotected amphibian PD could therefore be even higher as more data  
346 becomes available.

##### 347 *4.2. PD Distribution and Priority Areas*

348 Northern regions of South America contain the most amphibian species-rich area of  
349 the world (Stuart et al. 2004; Fritz & Rahbek 2012) and some parts appear to provide  
350 relatively strong protection for amphibian PD. However, priority regions for  
351 unprotected amphibian PD conservation occur in the northern Andes, the Atlantic

352 forests of Brazil and the Eastern United States (US). Area-based conservation is  
353 complex and confounded by conflicting priorities; PAs tend to be designated in  
354 inaccessible places not wanted for other land uses and often suffer from a lack of  
355 international coordination (Visconti et al. 2019). In order to be effective, the post-  
356 2020 biodiversity framework must ensure spatial prioritisations to determine PAs  
357 value areas of high biodiversity importance and that various ecological and  
358 evolutionary processes are captured across borders (Visconti et al. 2019). The  
359 northern Andes and Atlantic forests are recognised as both Key Biodiversity Areas  
360 (KBAs) and UNESCO world heritage sites (Birdlife International 2020; UNESCO  
361 Institute for Statistics 2020). In combination with our high concentration of  
362 unprotected PD, it is clear that protecting these regions is of incredible importance.

363 At less stringent PTs, regions such as the US, the Northern Andes, Atlantic forests of  
364 Brazil, Madagascar and China remain priorities, whereas Europe, Japan and the  
365 Philippines appear to be more well protected. Previous studies into the protection of  
366 amphibian PD in Europe suggest that placement and habitat overlap of PAs with  
367 suitable habitat of amphibians is also important to be considered at a national and  
368 regional scale (Thuiller et al. 2015).

369 Priority grid cells for Caudata occurred exclusively in the US, particularly across the  
370 Appalachian mountain ranges, therefore extension of the US PA network can  
371 determine the future PD protection of the whole Caudata group. Gymnophiona PD,  
372 shown to occur in Cameroon, the Western Ghats of India and the Seychelles,  
373 provide the opportunity to capture a significant amount of PD for a lineage whose  
374 evolutionary history and ecology remains poorly understood (Stuart et al. 2004).

#### 375 *4.3. Taxonomic overlap of unprotected PD*

376 Our analyses did highlight priority grid cells common to all clades; extending the PA  
377 network in the Atlantic forests of Brazil, Madagascar, and Hispaniola could capture  
378 large amounts of PD across all terrestrial vertebrate clades. For example, more than  
379 13% of our priority grid cells for all terrestrial vertebrates were located in  
380 Madagascar, an island where PAs currently cover just 6% of its land (IUCN & UNEP-  
381 WCMC 2019). There was a strong correlation in unprotected PD patterns across the  
382 vertebrate groups, however, amphibian PD is not as strongly correlated with either  
383 mammal, bird or squamate PD, as they are with one another, highlighting the  
384 importance of identifying and conserving priority regions of unprotected amphibian  
385 PD in order to enhance overall terrestrial vertebrate PD protection. Priority grid cells  
386 of unprotected PD unique to amphibians predominantly coincide with areas already  
387 valued as Key Biodiversity Areas (Birdlife International 2020), re-emphasising the  
388 need for their protection.

#### 389 *4.4. Large PD gains possible for small PA increases*

390 We have identified areas where increased protection could provide the largest gains  
391 in the conservation of amphibian evolutionary history. Increasing protection in only  
392 ~2.5% of the grid cells with amphibians could potentially capture ~30% (> 40 Gyr) of  
393 the evolutionary history of all amphibians and more than half of currently imperilled  
394 amphibian PD, offering an important opportunity to make large gains in amphibian  
395 PD conservation.

396 Our analysis has focused on PAs in IUCN management categories I and II because  
397 research has shown the reliable contribution of these PAs to biodiversity  
398 conservation (Jones et al. 2018). Amphibians are particularly susceptible to  
399 anthropogenic disturbance, therefore increasing restrictions in 23% (67/289 priority  
400 grid cells) of the priority regions found here, where there are PAs present but none  
401 that are managed as IUCN management categories I and II, will also benefit PD  
402 conservation. This is particularly relevant when considering the feasibility of  
403 transitioning to strict management from other classifications over establishing entirely  
404 new PAs and therefore presents an opportunity to also make rapid gains in PD  
405 conservation. We note that whether such a proportion of grid cells needs to be  
406 protected depends on the extent of suitable available habitat within the grid cells.  
407 Further work is needed to determine the opportunity cost of the priority regions and  
408 identify the optimal areas for protection to make sure that both cost efficiency and  
409 biodiversity gain are considered and weighted in the PA decision making  
410 (Carwardine et al. 2008a, 2008b; Venter et al. 2014).

#### 411 *4.5. Conclusion*

412 PA expansion is high on the international agenda for the upcoming United Nations  
413 conferences as a tool to effectively protect biodiversity and the importance of  
414 conserving evolutionary history is gaining recognition. In order for this agenda to be  
415 adequately met there is an urgent need to prioritise under-represented species in  
416 conservation. Terrestrial vertebrates are an important group that require its own  
417 priorities that are better balanced across taxa. The assessment of terrestrial  
418 vertebrates in terms of their PD confirms that both amphibians and squamate reptiles  
419 are disproportionately under protected within the current global PA network.  
420 Relatively small increases in the PA network, as well as improvements of the existing  
421 network in key areas of high amphibian PD, could prevent a trajectory of excessive  
422 and unacceptable losses of evolutionary history and future options for humanity.

#### 423 **5. Acknowledgements**

424 We thank the Department of Infectious Disease (DIDE) at Imperial College London  
425 for providing access to their high-performance computer to run these analyses. We  
426 also would like to thank Gerardo Martin and Trent Garner for their insightful  
427 comments. This work was supported by the Zoological Society London's EDGE of  
428 Existence programme and the DIDE department at Imperial College London. R.  
429 Gumbs was funded by the NERC Science and Solutions for a Changing Planet  
430 Doctoral Training Programme (grant number NE/L002515/1).

#### 431 **6. References**

- 432 Birdlife International. 2020. The World Database of Key Biodiversity Areas. Developed by  
433 the Key Biodiversity Areas Partnership. Available from  
434 <http://www.keybiodiversityareas.org/home> (accessed March 4, 2020).
- 435 Birdlife International, Handbook of the Birds of the World. 2017. Bird species distribution  
436 maps of the world. Version 7.0. Available from  
437 <http://datazone.birdlife.org/species/requestdis>.
- 438 Blaustein AR. 1994. Chicken Little or Nero's fiddle? A perspective on declining amphibian  
439 populations. *Herpetologica* **50**:85–97. Available from

- 440 [http://people.oregonstate.edu/~blaustea/publications/AmpDeclines/BlausteinHerpetolog](http://people.oregonstate.edu/~blaustea/publications/AmpDeclines/BlausteinHerpetologica1994.pdf)  
441 [ica1994.pdf](http://people.oregonstate.edu/~blaustea/publications/AmpDeclines/BlausteinHerpetologica1994.pdf).
- 442 Böhm M et al. 2013. The conservation status of the world's reptiles. *Biological Conservation*  
443 **157**:372–385. Available from  
444 <http://linkinghub.elsevier.com/retrieve/pii/S0006320712003357>.
- 445 Carwardine J, Wilson KA, Ceballos G, Ehrlich PR, Naidoo R, Iwamura T, Hajkovicz SA,  
446 Possingham HP. 2008a. Cost-effective priorities for global mammal conservation.  
447 *Proceedings of the National Academy of Sciences* **105**:11446–11450. Available from  
448 <http://www.pnas.org/cgi/doi/10.1073/pnas.0707157105>.
- 449 Carwardine J, Wilson KA, Watts M, Etter A, Klein CJ, Possingham HP. 2008b. Avoiding  
450 costly conservation mistakes: The importance of defining actions and costs in spatial  
451 priority settings. *PLoS ONE* **3**. Available from  
452 <https://journals.plos.org/plosone/article?id=10.1371/journal.pone.0002586>.
- 453 Chanson J, Hoffmann M, Cox N, Stuart S. 2008. The State of the World's Amphibians.  
454 Pages 33–52 in S. Stuart, M. Hoffmann, J. Chanson, N. Cox, R. Berridge, P. Ramani,  
455 and B. Young, editors. *Threatened Amphibians of the World*. Barcelona, Spain.
- 456 Clark JA, May RM. 2002. Taxonomic Bias in Conservation Research. *Science* **297**:191b –  
457 192. Available from <http://www.sciencemag.org/cgi/doi/10.1126/science.297.5579.191b>.
- 458 Colón-Gaud C, Whiles MR, Kilham SS, Lips KR, Pringle CM, Connelly S, Peterson SD.  
459 2009. Assessing ecological responses to catastrophic amphibian declines: Patterns of  
460 macroinvertebrate production and food web structure in upland Panamanian streams.  
461 *Limnology and Oceanography* **54**:331–343. Available from  
462 <http://doi.wiley.com/10.4319/lo.2009.54.1.0331>.
- 463 Dormann CF et al. 2007. Methods to account for spatial autocorrelation in the analysis of  
464 species distributional data: A review. *Ecography* **30**:609–628. Available from  
465 <http://doi.wiley.com/10.1111/j.2007.0906-7590.05171.x>.
- 466 Faith DP. 1992. Conservation evaluation and phylogenetic diversity. *Biological Conservation*  
467 **61**:1–10. Available from  
468 <https://www.sciencedirect.com/science/article/pii/0006320792912013>.
- 469 Forest F et al. 2007. Preserving the evolutionary potential of floras in biodiversity hotspots.  
470 *Nature* **445**:757–760. Available from <https://www.nature.com/articles/nature05587>.
- 471 Fritz SA, Rahbek C. 2012. Global patterns of amphibian phylogenetic diversity. *Journal of*  
472 *Biogeography* **39**:1373–1382. Available from [http://doi.wiley.com/10.1111/j.1365-](http://doi.wiley.com/10.1111/j.1365-2699.2012.02757.x)  
473 [2699.2012.02757.x](http://doi.wiley.com/10.1111/j.1365-2699.2012.02757.x).
- 474 Frost DR. 2020. *Amphibian Species of the World: an Online Reference*. Version 6.1.  
475 Available from <https://amphibiansoftheworld.amnh.org/index.php> (accessed April 18,  
476 2020).
- 477 Gardner TA, Barlow J, Peres CA. 2007. Paradox, presumption and pitfalls in conservation  
478 biology: The importance of habitat change for amphibians and reptiles. *Biological*  
479 *Conservation* **138**:166–179. Available from  
480 <https://www.sciencedirect.com/science/article/abs/pii/S0006320707001656>.
- 481 Gittleman JL, Kot M. 1990. Adaptation: Statistics and a Null Model for Estimating



- 482 Phylogenetic Effects. *Systematic Zoology* **39**:227. Available from  
483 <https://academic.oup.com/sysbio/article-lookup/doi/10.2307/2992183>.
- 484 González-del-Piiego P, Freckleton RP, Edwards DP, Koo MS, Scheffers BR, Pyron RA, Jetz  
485 W. 2019. Phylogenetic and Trait-Based Prediction of Extinction Risk for Data-Deficient  
486 Amphibians. *Current Biology* **29**:1557-1563.e3. Available from  
487 <https://www.sciencedirect.com/science/article/pii/S0960982219304038>.
- 488 Gray CL, Hill SLL, Newbold T, Hudson LN, Börger L, Contu S, Hoskins AJ, Ferrier S, Purvis  
489 A, Scharlemann JPW. 2016. Local biodiversity is higher inside than outside terrestrial  
490 protected areas worldwide. *Nature Communications* **7**:12306. Available from  
491 <http://www.nature.com/doi/10.1038/ncomms12306>.
- 492 Gumbs R, Gray CL, Böhm M, Hoffmann M, Grenyer R, Jetz W, Meiri S, Roll U, Owen NR,  
493 Rosindell J. 2020. Global priorities for conservation of reptilian phylogenetic diversity in  
494 the face of human impacts. *Nature Communications* **11**. Nature Research. Available  
495 from <https://www.nature.com/articles/s41467-020-16410-6>.
- 496 Hurlbert AH, Jetz W. 2007. Species richness, hotspots, and the scale dependence of range  
497 maps in ecology and conservation. *Proceedings of the National Academy of Sciences*  
498 **104**:13384–13389. Available from  
499 <http://www.pnas.org/cgi/doi/10.1073/pnas.0704469104>.
- 500 IPBES. 2019. The global assessment report on of the IPBES global assessment report on  
501 biodiversity and ecosystem services: summury on policymakers. Available from  
502 [https://ipbes.net/system/tdf/ipbes\\_global\\_assessment\\_report\\_summary\\_for\\_policymake](https://ipbes.net/system/tdf/ipbes_global_assessment_report_summary_for_policymakers.pdf?file=1&type=node&id=35329)  
503 [rs.pdf?file=1&type=node&id=35329](https://ipbes.net/system/tdf/ipbes_global_assessment_report_summary_for_policymakers.pdf?file=1&type=node&id=35329).
- 504 IUCN. 2017. The IUCN Red List of Threatened Species. Version 2016-1. Available from  
505 <http://www.iucnredlist.org> (accessed May 25, 2017).
- 506 IUCN. 2018. The IUCN Red List of Threatened Species. Version 2018-1. Available from  
507 <http://www.iucnredlist.org> (accessed May 17, 2018).
- 508 IUCN. 2020. The IUCN Red List of Threatened Species. Version 2020-1. Available from  
509 <http://www.iucnredlist.org> (accessed April 18, 2020).
- 510 IUCN, UNEP-WCMC. 2019. The World Database on Protected Areas (WDPA) [Jan 2019].  
511 Available from [www.protectedplanet.net](http://www.protectedplanet.net).
- 512 Jetz W, Pyron RA. 2018. The interplay of past diversification and evolutionary isolation with  
513 present imperilment across the amphibian tree of life. *Nature Ecology & Evolution*  
514 **2**:850–858. Springer US. Available from <http://dx.doi.org/10.1038/s41559-018-0515-5>.
- 515 Jetz W, Thomas GH, Joy JB, Redding DW, Hartmann K, Mooers AO. 2014. Global  
516 Distribution and Conservation of Evolutionary Distinctness in Birds. *Current Biology*  
517 **24**:919–930. Available from <http://dx.doi.org/10.1016/j.cub.2014.03.011>.
- 518 Jones KR, Venter O, Fuller RA, Allan JR, Maxwell SL, Negret PJ, Watson JEM. 2018. One-  
519 third of global protected land is under intense human pressure. *Science* **360**:788–791.  
520 Available from <http://www.sciencemag.org/lookup/doi/10.1126/science.aap9565>.
- 521 Kuhn TS, Mooers AØ, Thomas GH. 2011. A simple polytomy resolver for dated phylogenies.  
522 *Methods in Ecology and Evolution* **2**:427–436. Available from  
523 <http://doi.wiley.com/10.1111/j.2041-210X.2011.00103.x>.



- 524 Leader-Williams N, Dublin H. 2000. Charismatic megafauna as 'flagship' species. Pages 53–  
525 81 in A. Entwistle and N. Dunstone, editors. *Priorities for the conservation of*  
526 *mammalian diversity. Has the Panda had its day?* Cambridge University Press.
- 527 McGowan J et al. 2020. Conservation prioritization can resolve the flagship species  
528 conundrum. *Nature Communications* **11**:1–7. Springer US. Available from  
529 <http://dx.doi.org/10.1038/s41467-020-14554-z>.
- 530 Meiri S, Chapple DG. 2016. Biases in the current knowledge of threat status in lizards, and  
531 bridging the 'assessment gap.' *Biological Conservation* **204**:6–15. Available from  
532 <http://dx.doi.org/10.1016/j.biocon.2016.03.009>.
- 533 Nori J, Loyola R. 2015. On the worrying fate of data deficient amphibians. *PLoS ONE* **10**:8–  
534 15. Available from  
535 <https://journals.plos.org/plosone/article?id=10.1371/journal.pone.0125055>.
- 536 Pacifici M, Di Marco M, Watson JEM. 2020. Protected areas are now the last strongholds for  
537 many imperiled mammal species. *Conservation Letters*. e12748. Available from  
538 <https://doi.org/10.1111/conl.12748>.
- 539 Pollock LJ, Thuiller W, Jetz W. 2017. Large conservation gains possible for global  
540 biodiversity facets. *Nature* **546**:141–144. Available from  
541 <http://www.nature.com/doi/10.1038/nature22368>.
- 542 R Core Team. 2019. *R: A Language and Environment for Statistical Computing*. R  
543 Foundation for Statistical Computing. Version 3.5.3. Vienna, Austria. Available from  
544 <https://www.r-project.org/>.
- 545 Rodrigues ASL et al. 2004a. Global Gap Analysis: Priority Regions for Expanding the Global  
546 Protected-Area Network. *Bioscience* **54**:1092–1100. Available from  
547 <http://dx.doi.org/10.1641/0006-3>.
- 548 Rodrigues ASL et al. 2004b. Effectiveness of the global protected area network in  
549 representing species diversity. *Nature* **428**:640–643. Available from  
550 <http://www.nature.com/articles/nature02422>.
- 551 Roll U et al. 2017. The global distribution of tetrapods reveals a need for targeted reptile  
552 conservation. *Nature Ecology and Evolution* **1**:1677–1682. Available from  
553 <http://dx.doi.org/10.1038/s41559-017-0332-2>.
- 554 Rosauer DF, Pollock LJ, Linke S, Jetz W. 2017. Phylogenetically informed spatial planning is  
555 required to conserve the mammalian tree of life. *Proceedings of the Royal Society B:*  
556 *Biological Sciences* **284**:20170627. Available from  
557 <http://rspb.royalsocietypublishing.org/lookup/doi/10.1098/rspb.2017.0627>.
- 558 Safi K, Armour-Marshall K, Baillie JEM, Isaac NJB. 2013. Global Patterns of Evolutionary  
559 Distinct and Globally Endangered Amphibians and Mammals. *PLoS ONE* **8**:e63582.  
560 Available from <http://dx.plos.org/10.1371/journal.pone.0063582>.
- 561 Scott JM et al. 1994. Gap analysis: a geographic approach to protection of biological  
562 diversity. *Biological Conservation* **67**:91. Available from  
563 <http://linkinghub.elsevier.com/retrieve/pii/0006320794900221>.
- 564 Stuart S, Hoffmann M, Chanson J, Cox N, Berridge R, Ramani P, Young B, editors. 2008.  
565 *Threatened amphibians of the world*. Page Lynx Edicions, IUCN and Conservation

- 566 International. Available from  
567 <https://linkinghub.elsevier.com/retrieve/pii/S0006320706001236>.
- 568 Stuart SN, Chanson JS, Cox NA, Young BE, Rodrigues ASL, Fischman DL, Waller RW.  
569 2004. Status and Trends of Amphibian Declines and Extinctions Worldwide. *Science*  
570 **306**:1783–1786. Available from  
571 <http://www.sciencemag.org/lookup/doi/10.1126/science.1103538>.
- 572 Tapley B, Michaels CJ, Gumbs R, Böhm M, Luedtke J, Pearce-Kelly P, Rowley JLL. 2018.  
573 The disparity between species description and conservation assessment: A case study  
574 in taxa with high rates of species discovery. *Biological Conservation* **220**:209–214.  
575 Available from <https://doi.org/10.1016/j.biocon.2018.01.022>.
- 576 Thomas GH, Hartmann K, Jetz W, Joy JB, Mimoto A, Mooers AO. 2013. PASTIS: An R  
577 package to facilitate phylogenetic assembly with soft taxonomic inferences. *Methods in*  
578 *Ecology and Evolution* **4**:1011–1017. Available from [https://doi.org/10.1111/2041-](https://doi.org/10.1111/2041-210X.12117)  
579 [210X.12117](https://doi.org/10.1111/2041-210X.12117).
- 580 Thuiller W, Maiorano L, Mazel F, Guilhaumon F, Ficetola GF, Lavergne S, Renaud J, Roquet  
581 C, Mouillot D. 2015. Conserving the functional and phylogenetic trees of life of  
582 European tetrapods. *Philosophical Transactions of the Royal Society B: Biological*  
583 *Sciences* **370**:20140005–20140005. Available from  
584 <http://rstb.royalsocietypublishing.org/cgi/doi/10.1098/rstb.2014.0005>.
- 585 Tonini JFR, Beard KH, Ferreira RB, Jetz W, Pyron RA. 2016. Fully-sampled phylogenies of  
586 squamates reveal evolutionary patterns in threat status. *Biological Conservation*  
587 **204**:23–31. Available from <http://dx.doi.org/10.1016/j.biocon.2016.03.039>.
- 588 Uetz P, Freed P, Hosek J. (eds.) 2018. The Reptile Database. Available from  
589 <http://www.reptile-database.org> (accessed 22 July 2018).
- 590 UNESCO Institute for Statistics. 2020. World Heritage List. Available from  
591 <https://whc.unesco.org/en/list/> (accessed March 6, 2020).
- 592 Vallejos R, Osorio F, Bevilacqua M. 2018. Spatial Relationships Between Two  
593 Georeferenced Variables: with Applications in R. New York. Available from  
594 <http://srb2gv.mat.utfsm.cl>.
- 595 Venter O et al. 2014. Targeting Global Protected Area Expansion for Imperiled Biodiversity.  
596 *PLoS Biology* **12**:e1001891. Available from  
597 <http://dx.plos.org/10.1371/journal.pbio.1001891>.
- 598 Visconti BP, Butchart SHM, Brooks TM, Langhammer PF, Marnewick D, Vergara S,  
599 Yanosky A, Watson JEM. 2019. Protected area targets post-2020. *Science* **364**:239–  
600 241. Available from <https://science.sciencemag.org/content/364/6437/239>.
- 601 Zipkin EF, DiRenzo G V., Ray JM, Rossman S, Lips KR. 2020. Tropical snake diversity  
602 collapses after widespread amphibian loss. *Science* **367**:814–816. Available from  
603 <https://doi.org/10.1126/science.aay5733>.

604

605 **7. Tables**

606 Table 1: Percentage of amphibian grid cells, terrestrial vertebrate species and  
 607 phylogenetic diversity in IUCN PA management category I or II under different  
 608 protection thresholds (PTs). Results for all other PTs are given in Table A1.

| Item description                                                                      | Protection threshold (PT) <sup>a</sup> |                                   |
|---------------------------------------------------------------------------------------|----------------------------------------|-----------------------------------|
|                                                                                       | >0%                                    | >20%                              |
| Amphibian grid cells protected (as a percent of total amphibian grid cells)           | 6748 (58.77%)                          | 1192 (10.38%), see also Figure A7 |
| Amphibian species unprotected (as a percent of total species)                         | 1190 (20%)                             | 4579 (78%)                        |
| Caudata species                                                                       | 92 (18%)                               | 489 (93%)                         |
| Anura species                                                                         | 1063 (20%)                             | 3992 (77%)                        |
| Gymnophiona species                                                                   | 26 (17%)                               | 119 (79%)                         |
| Bird species unprotected (as a percent of total species)                              | 650 (9%)                               | 2818 (39%)                        |
| Mammal species unprotected (as a percent of total species)                            | 478 (11%)                              | 2138 (49%)                        |
| Squamate species unprotected (as a percent of total species)                          | 1786 (19%)                             | 6581 (71%)                        |
| Amphibian PD <sup>b</sup> in billions of years unprotected (as a percent of total PD) | 14.56 (12%)                            | 75.88 (64%)                       |
| Caudata PD                                                                            | 1.17 (12%)                             | 7.82 (78%)                        |
| Anura PD                                                                              | 12.45 (12%)                            | 64.33 (63%)                       |
| Gymnophiona PD                                                                        | 0.76 (12%)                             | 3.96 (64%)                        |
| Bird PD in billions of years unprotected (as a percent of total PD)                   | 3 (4%)                                 | 16.44 (24%)                       |
| Mammal PD in billions of years unprotected (as a percent of total PD)                 | 2.7 (6%)                               | 14.68 (34%)                       |
| Squamate PD in billions of years unprotected (as a percent of total PD)               | 15.22 (12%)                            | 72.24 (59%)                       |

609 <sup>a</sup>PT = Protection threshold

610 <sup>b</sup>PD = phylogenetic diversity

611 **8. Figures**

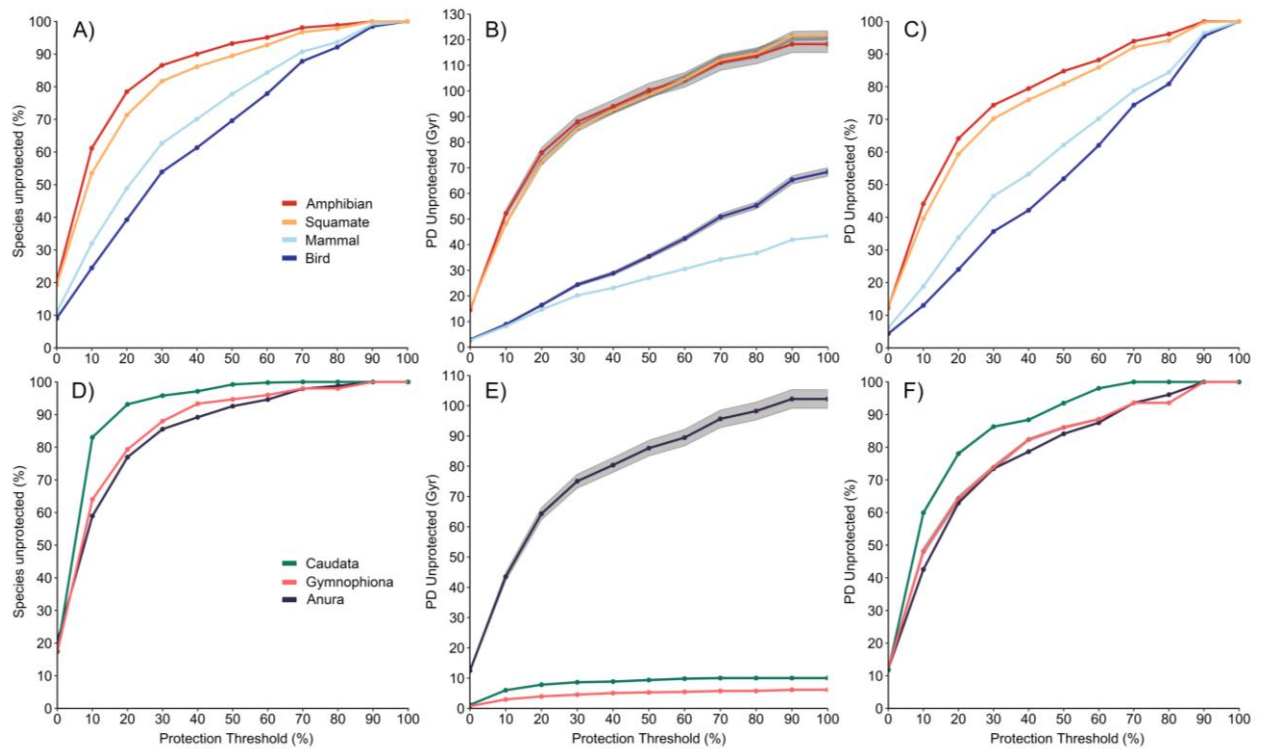

612

613 **Figure 1.** The percentage of species unprotected (A, D), the amount of unprotected  
614 PD in billions of years (Gyr; B, E) and the percentage of unprotected Phylogenetic  
615 Diversity (PD; C, F) for each taxonomic group (amphibians, squamates, mammals  
616 and birds; A-C) and amphibian Order (Anura, Caudata and Gymnophiona; D-F).  
617 Plots B, C, E and F show the mean +95% confidence interval (shaded grey) for the  
618 results of the 25 different phylogenetic trees, though the CI on plots C and F are  
619 narrow and barely visible behind the mean plot line.

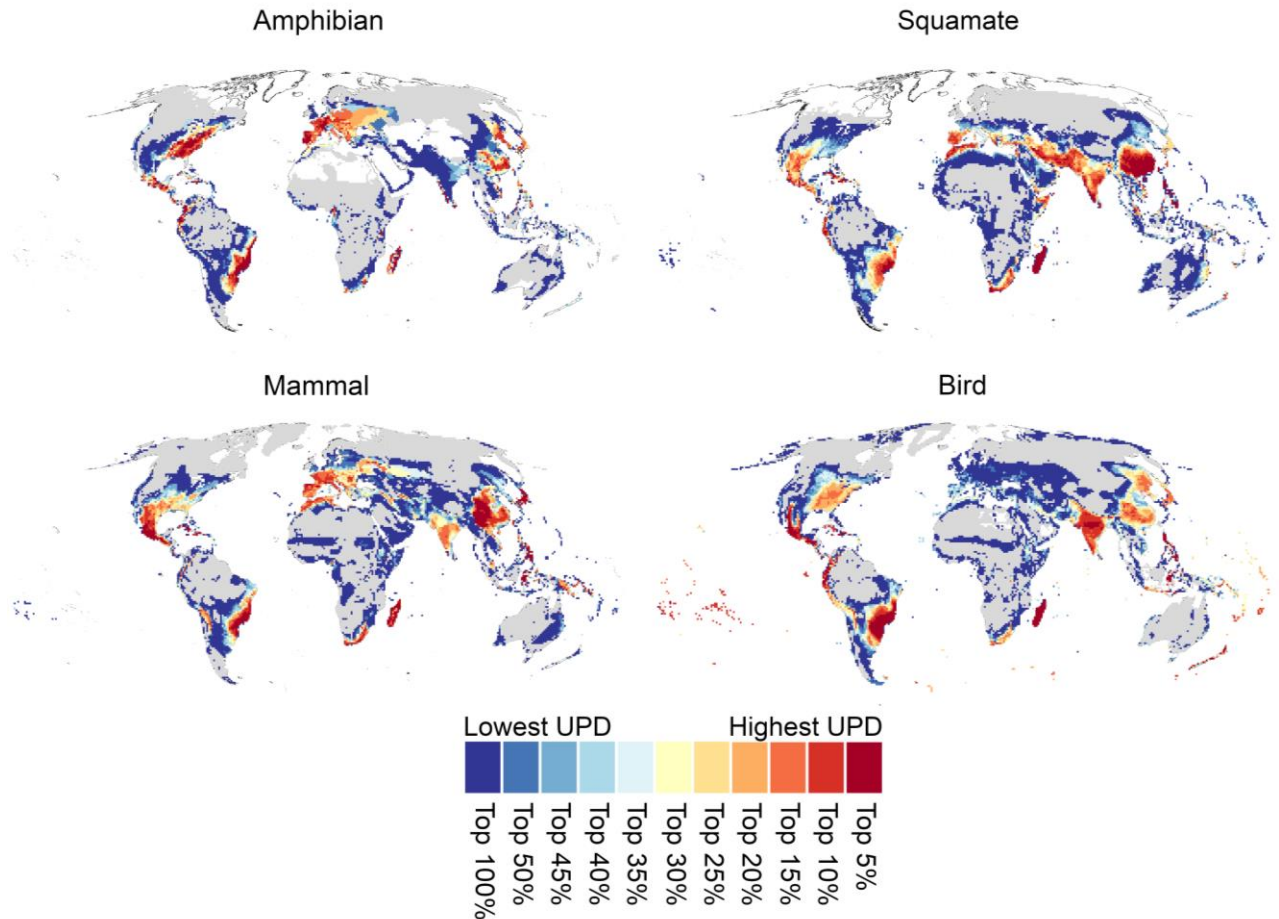

620

621 **Figure 2.** The distribution of unprotected phylogenetic diversity (UPD) for  
622 amphibians, mammals, birds and squamates, contrasted in ascending order of their  
623 level of protection. Dark grey area indicates the ranges of species that are protected  
624 in at least one grid cell. All maps were made under the >20% PT and results are the  
625 average across 25 separate phylogenetic trees. The maps for all other PT's for  
626 amphibians are presented in the supporting information (**Figure A4**).



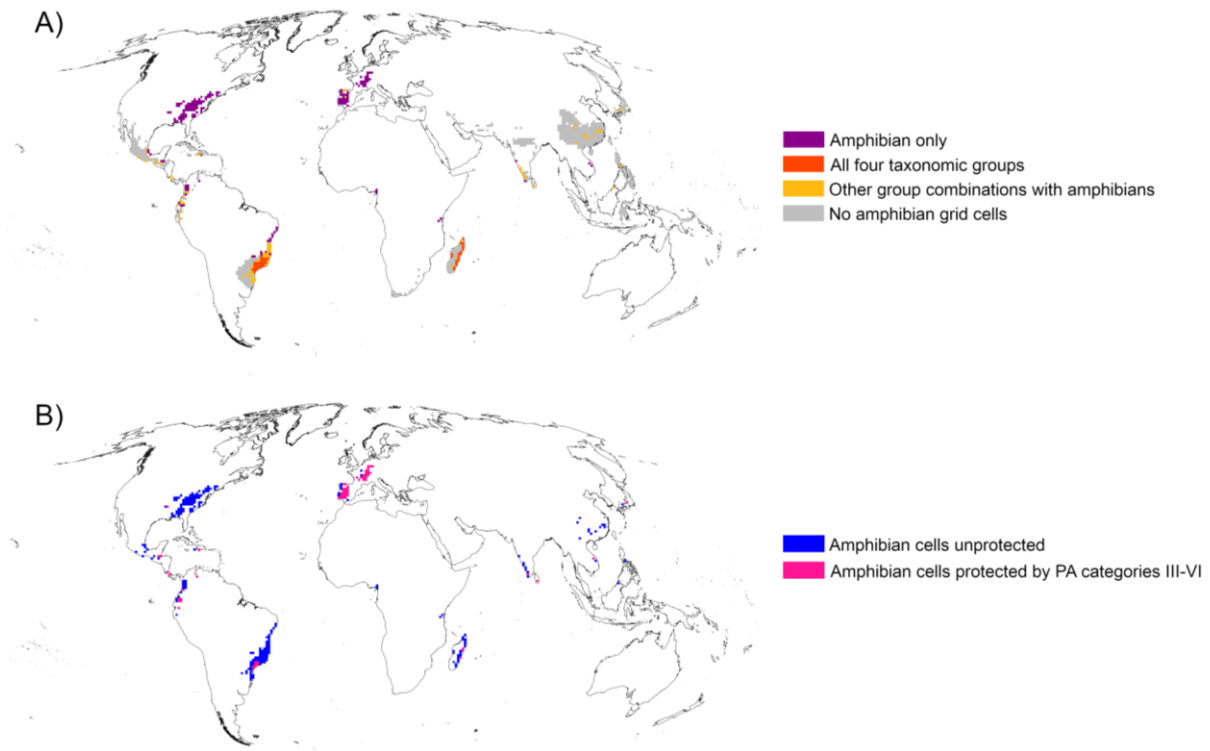

627

628 **Figure 3.** Priority grid cells when analyses were run at the >20% PT, calculated as  
629 the top 5% of grid cells containing the largest amount of unprotected phylogenetic  
630 diversity. **A)** The priority grid cells for all taxonomic groups. **B)** The Priority grid cells  
631 for amphibians only, with cells currently protected by PA categories III-VI highlighted.

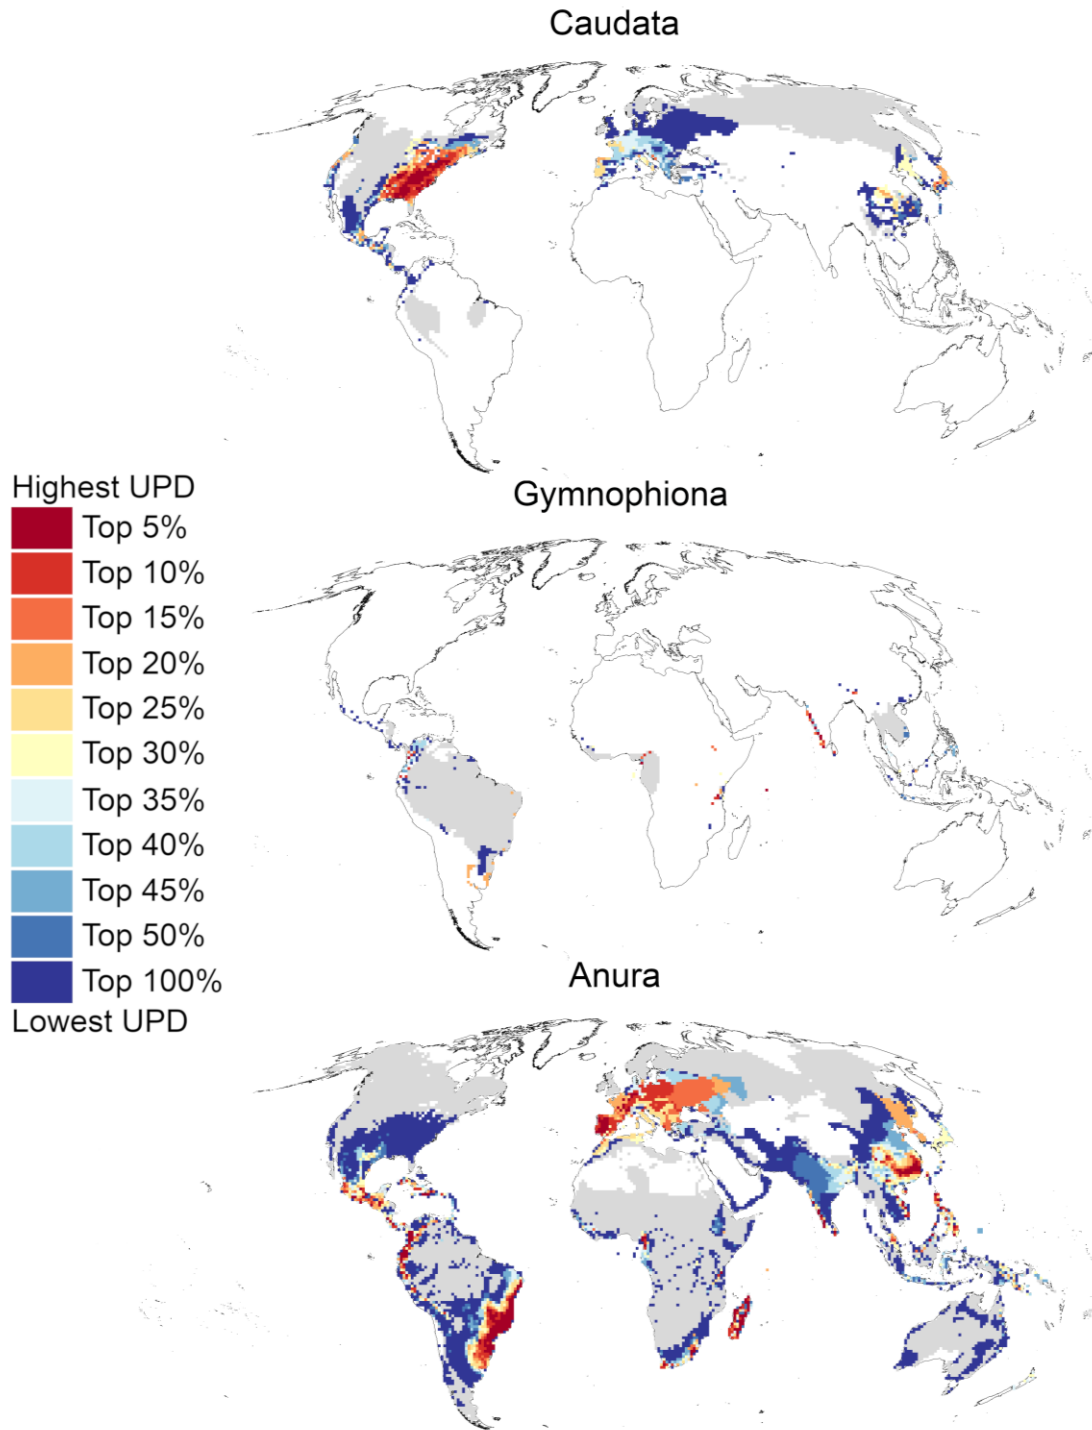

632

633 **Figure 4.** The distribution of unprotected phylogenetic diversity (UPD) for all three  
634 amphibian Orders, Anura, Gymnophiona and Caudata, contrasted in ascending  
635 order of their level of protection. Dark grey area indicates the ranges of species that  
636 are protected in at least one grid cell. All maps were made under the >20% PT and  
637 results are the average across 25 separate phylogenetic trees.
